# Supplementary material
Source: PubMed Central journal article supplement (PMC6053658)
Supplement: develop-145-161083-s1.pdf [file develop-145-161083-s1.pdf]

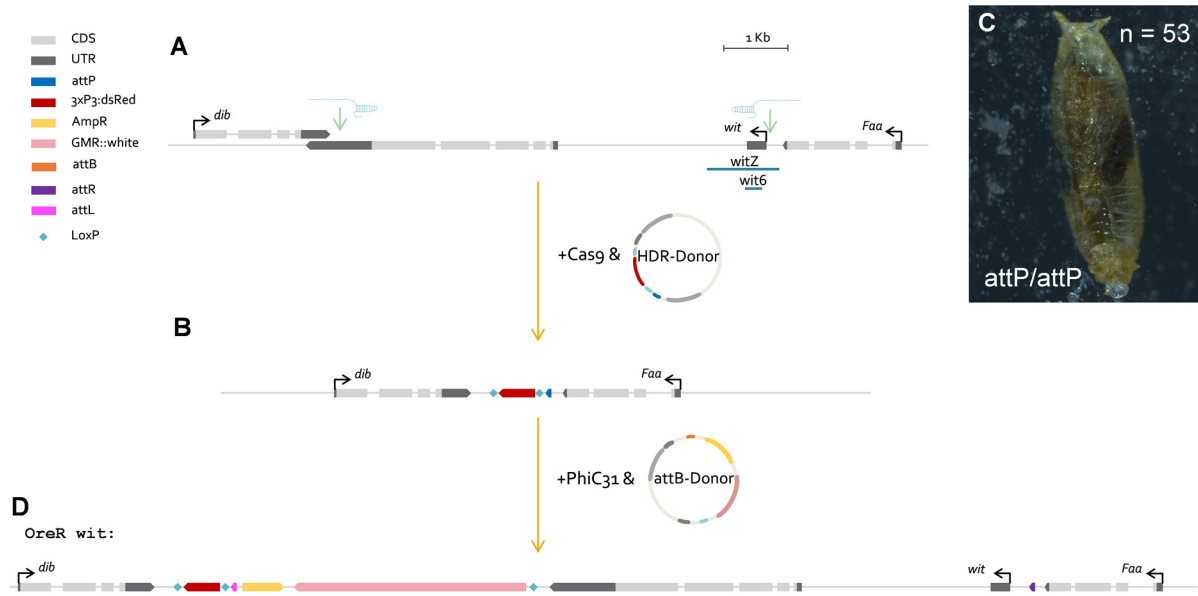

**S1. Generation of *wit* null allele.** (A) Schematic of null allele generation. Two chimeric guideRNAs are used to remove the *wit* locus. Florescent red eyes are used as positive selection and this positive selection is floxed for removal (cyan). The adjacent *attP* site serves as docking site for future modifications (blue). The location of *witZ* and *wit6* enhancers is denoted. (B) Rescue allele donors are targeted to the *wit* locus by  $\phi$ C31, in this case the WT allele. (C) Homozygous null flies fail to eclose from the pupal casing. Number of pupae scored is denoted by “n”. Scale bars are 1Kb in size.

**A**

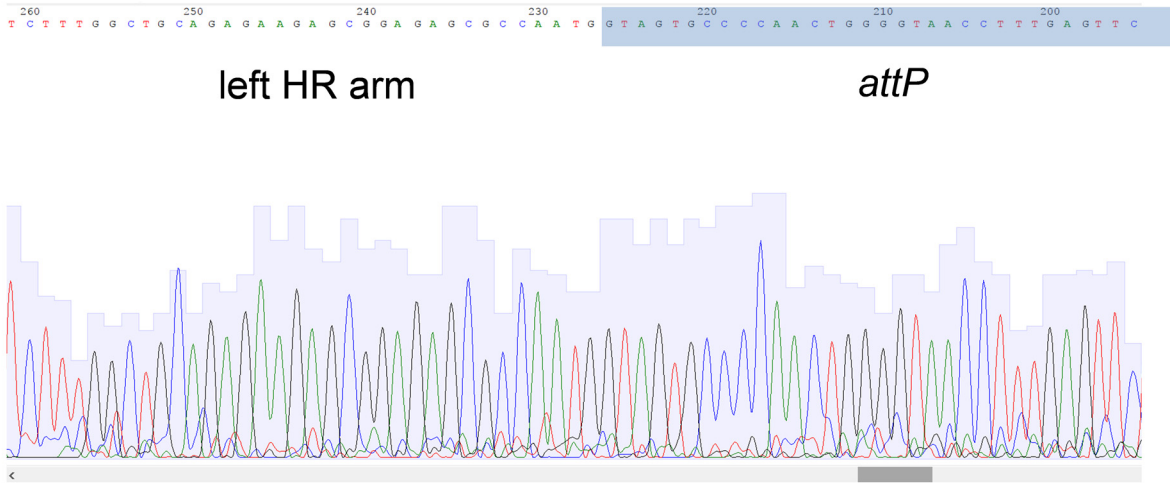

**B**

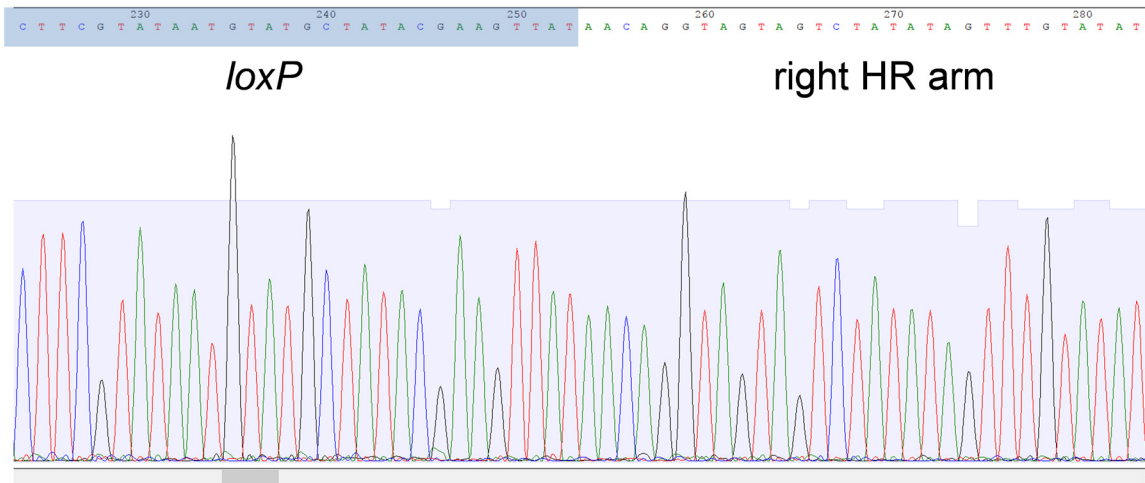

**S2. Sequences of attP *wit* null allele. (A)** Sequence of the left arm of the null allele includes the *attP* site. **(B)** Sequencing of the right arm of the null allele includes the *loxP* site.

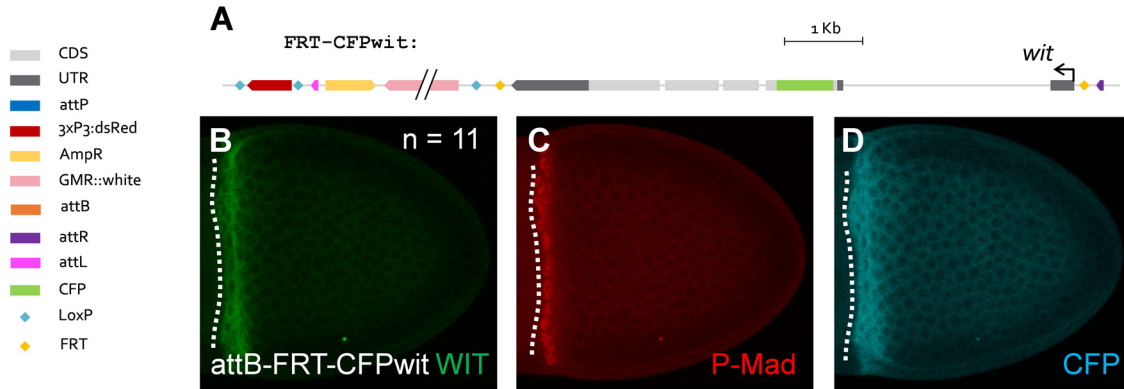

**S3. The *wit* null CRISPR/Cas9 fly is rescued by insertion of engineered *D. melanogaster cfp-wit* allele.** (A) Diagram of N-terminal fusion of CFP-WIT inserted into the *wit* locus. (B) CFP-WIT is detected by the WIT antibody in the WT anterior pattern. (C) P-Mad is expressed in the WT anterior domain in two-cell rows wide. (D) CFP is detected by and anti-GFP antibody in the anterior. Dotted line denoted the anterior border of the oocyte-associate follicle cells. Number of egg chambers scored with a similar pattern are denoted by “n”. Scale bars are 1Kb in size.

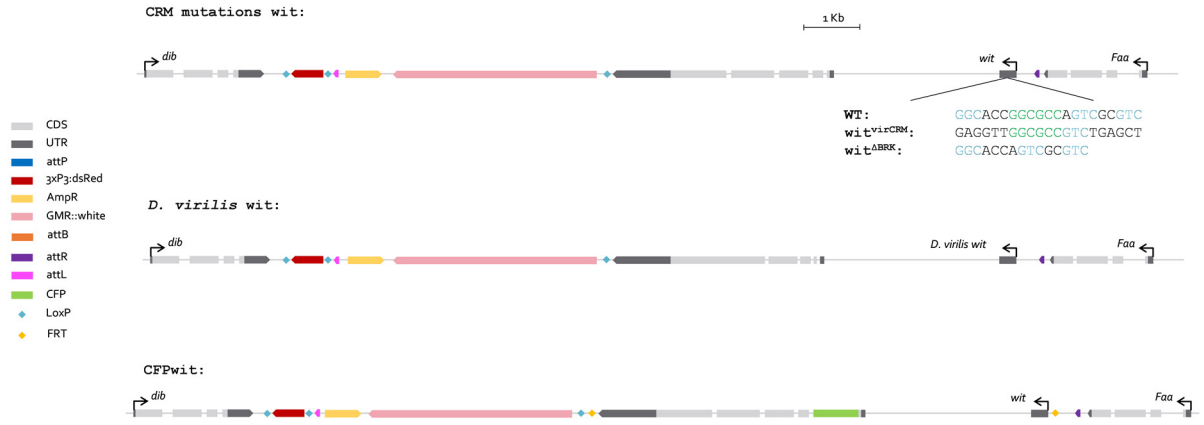

**S4. Diagrams of all *wit* rescue constructs.** Depicted are diagrams of all of the rescue alleles utilized in this report. Scale bars are 1Kb in size.

**Supplemental Table 1 – List of primers for enhancers**

| Name                         | Sequence                             | Description                |
|------------------------------|--------------------------------------|----------------------------|
| witZ1_forward                | AGGCTCACATTCTCCTTCG                  | wit1                       |
| witZ1_reverse_new            | TACACCGACTGTCGCAGTTT                 |                            |
| witZ2_forward                | GTCCCCATCCTCAGACACAT                 | wit2                       |
| witZ2_reverse                | CCCATTGTTTACTGTGTGGAA                |                            |
| witZ3_forward                | GCGAAGGGAATTTGAATGG                  | wit3                       |
| witZ3_reverse                | TGTCTGCTCACAGTACACATGC               |                            |
| witZ4_forward                | AATGGCCCCTTGATCCTACT                 | wit4                       |
| witZ4_reverse                | TCCACTCTGCGCAAGTACAC                 |                            |
| witZ5_forward                | CCCTTCGCTAGTCAGCGTAT                 | wit5                       |
| witZ5_reverse                | CGAGTGTGCAACTTCTTTTCG                |                            |
| witZ6_forward                | TGCGAGCAGCACTTACACTT                 | wit6                       |
| witZ6_reverse                | GCCTATCGGGCAAACCTTGT                 |                            |
| witZ7_forward                | GTCTGCTTTGCGCTGCAC                   | wit7                       |
| witZ7_reverse                | CCAATGGGAGCATAGCTGAG                 |                            |
| witZ8_forward                | CCGACTTTTCGAGGAATGAAT                | wit8                       |
| witZ8_reverse                | TTTCGCTCTCTCGCTACGAT                 |                            |
| witZ9_forward                | TTTACGAAGCTGCGTGGAAT                 | wit9                       |
| witZ9_reverse                | GGCCATCCATAGTAGCGTATACG              |                            |
|                              |                                      |                            |
| vir_wit_big_forward          | GGTCATCATTGCGGGACAC                  |                            |
| vir_wit_small_reverse        | ACTCGTCTCGTTTCAAGTGC                 |                            |
| vir_wit_small_split1_reverse | TCGGGATACGATGTCAAAAACA               |                            |
| vir_wit_small_split2_forward | TTTGACATCGTATCCCGACTC                |                            |
|                              |                                      |                            |
| wit6_mut_Forward             | TTATTGGGGCACCGatCCAGTCGCGTCTGCT      | wont bind Brk or Mad       |
| wit6_mut_Reverse             | AGCAGACGCGACTGGatCCGGTGCCCCAATAA     |                            |
| wit6_mut2_Forward            | TTATTGGGGCACCGaCGtCAGTCGCGTCTGCT     | wont bind Brk but will mad |
| wit6_mut2_Reverse            | AGCAGACGCGACTGaCGtCGGTGCCCCAATAA     |                            |
| wit6_mut3_Forward            | GGAAAATTTATTATTGGtGaACCGGCGCCAGTCGCG | wont bind Med+3            |
| wit6_mut3_Reverse            | CGCGACTGGCGCCGGtCaCCAATAATAAATTTTCC  |                            |
| wit6_mut4_Forward            | GGCACCGGCGCCAtTaGCGTCTGCTTTGC        | wont bind Med+1            |
| wit6_mut4_Reverse            | GCAAAGCAGACGCAaTGCGCCGGTGCC          |                            |
| wit6_mut5_Forward            | CACCGGCGCCAGTCGCAaTGCTTTGCGCTGCAC    | wont bind Med+6            |
| wit6_mut5_Reverse            | GTGCAGCGCAAAGCAaGCGACTGGCGCCGGTG     |                            |

**Supplemental Table 2 – List of primers for CRISPR**

| <b>Name</b>            | <b>Sequence</b>                                   | <b>Description</b>       |
|------------------------|---------------------------------------------------|--------------------------|
| wit_sense_guide1       | cttcGTCTTGGACAAGAGCGAAAC                          | wit CRIPSR               |
| wit_anti_guide1        | aaacGTTTCGCTCTTGTCCAAGAC                          |                          |
| wit_sense_guide2       | cttcGCGCTCAGCTATGCTCCCAT                          |                          |
| wit_anti_guide2        | aaacATGGGAGCATAGCTGAGCGC                          |                          |
|                        |                                                   |                          |
| wit_break1_hom_arm_for | CAAGcacctgcCAAGtgcGTGCCAGGGATATTCAGAAGTGG         | wit DONOR                |
| wit_break1_hom_arm_rev | CAAGcacctgcCAAGctacCATTGGCGCTCTCCGCTC             |                          |
| wit_break2_hom_arm_for | CAAGgctcttcCtatAACAGGTAGTAGTCTATATAGTTTGTATATGTGC |                          |
| wit_break2_hom_arm_rev | CAAGgctcttcCgacGTATTATCCCTTGCCAGACCACC            |                          |
|                        |                                                   |                          |
| wit_crispr_conf_left   | ATCCCCTTCATTCCCTACTCCCT                           | confirm CRISPR wit locus |
| wit_crispr_conf_right  | GGGCCGCGACTCTAGATCATAAT                           |                          |
| wit_crispr_WT_right    | AAGACACTGAGCTTGTACGACGA                           |                          |
| wit_crispr_conf2_for   | GTGCTCAACTCTTTCGCTCTCTCG                          |                          |
| wit_crispr_conf2_rev   | TAGCGACGTGTTCACTTTGCTTGT                          |                          |
| wit_inside_for         | GGGGAAACGAGTGTGAGGTGGAG                           |                          |
| wit_inside_rev         | ATCAATAGACGGGCCACACTCGC                           |                          |
| wit_outside_1_for      | AGTGCCAAGGACGAGCTATCCA                            |                          |
| wit_outside_2_rev      | CACCAATGTCGGCATTATGTTCC                           |                          |

**Supplemental Table 3 – List of primers for rescue vectors**

| Name                 | Sequence                                                  | Description          |
|----------------------|-----------------------------------------------------------|----------------------|
| wit_locus_left       | TGGGTATAAGTAAGTCGCCAGAGC                                  |                      |
| wit_locus_right      | GAAAAGAACGGACTGCGAATCGG                                   |                      |
|                      |                                                           |                      |
| wit_locus_L_FRT      | GAAGTTCCTATTcctagaaaGtATAGGAACTTcTGGGTATAAGTAAGTCGCCAGAGC |                      |
| wit_locus_R_FRT      | GAAGTTCCTATaCtttctagaGAATAGGAACTTcGAAAAGAACGGACTGCGAATCGG |                      |
|                      |                                                           |                      |
| wit_locus_left_R     | AGTGAGTACCTCAAAGTCTTCTTATCTATG                            |                      |
| wit_locus_right_F    | TGCTCTGCCAGCGAGATC                                        |                      |
| wit_CFP_F            | tcgctgggcagagcaATGGTGAGCAAGGGCGAG                         |                      |
| wit_CFP_R            | ttaggtactcactCTTGTACAGCTCGTCCATGC                         |                      |
|                      |                                                           |                      |
| pSC_R                | ACAGTGGATATCAAGCTTATCG                                    | vir CRM in mel locus |
| pSC2vir_wit_L_F      | agcttgatccactgtTGGGTATAAGTAAGTCGCC                        |                      |
| vir_wit_L2R_R        | gctcagacggcgccaacctcaCCAATAATAAATTTCCGACGAGTGTGCAAC       |                      |
| vir_wit_R2L_F        | tgaggtggcgccgtctgagcTGCTTTGCGCTGCACGGC                    |                      |
| vir_wit_R2pSC_R      | ctctagaactagtgatGAAAAGAACGGACTGCGAATCG                    |                      |
| pSC_F                | ATCCACTAGTTCTAGAGCGG                                      |                      |
|                      |                                                           |                      |
| assembly_delSmad_for | CGGAAAATTTATTATTGGGGCACCAGTCGCGTCTGCTTTGCG                | BRK site removed     |
| assem_dSmad_rev_sho  | CCCCAATAATAAATTTCCG                                       |                      |
|                      |                                                           |                      |
| vir_locus_F          | CCGGTGGAGCAATAAAAATG                                      |                      |
| vir_locus_R          | AACGTTCCCTTGACACAG                                        |                      |
